# Supplementary material for: The type III effector NopL interacts with GmREM1a and GmNFR5 to promote symbiosis in soybean
Source: PubMed Central journal article supplement (PMC11239682; doi:10.1038/s41467-024-50228-w), 2024-07-12
Supplement: 41467_2024_50228_MOESM3_ESM.pdf [file 41467_2024_50228_MOESM3_ESM.pdf]

## Description of Additional Supplementary Files

**Supplementary Data 1:** List of primers used in this work.

**Supplementary Data 2:** Proteins identified by LC-MS/MS

**Supplementary Data 3:** Differentially expressed genes identified using RNA-seq of WT nopL vs WT HH103

**Supplementary Data 4:** Differentially expressed genes identified using RNA-seq of WT nodA vs WT HH103

**Supplementary Data 5:** Differentially expressed genes identified using RNA-seq of rem1a HH103 vs WT HH103

**Supplementary Data 6:** Differentially expressed genes identified using RNA-seq of rem1a nopL vs WT HH103
